# Supplementary material for: Ellagic Acid Prevented Dextran-Sodium-Sulfate-Induced Colitis, Liver, and Brain Injury through Gut Microbiome Changes
Source: MDPI journal article supplement (doi:10.3390/antiox12101886), 2023-10-20
Supplement: s1 [file s1]

## Supplementary Figure

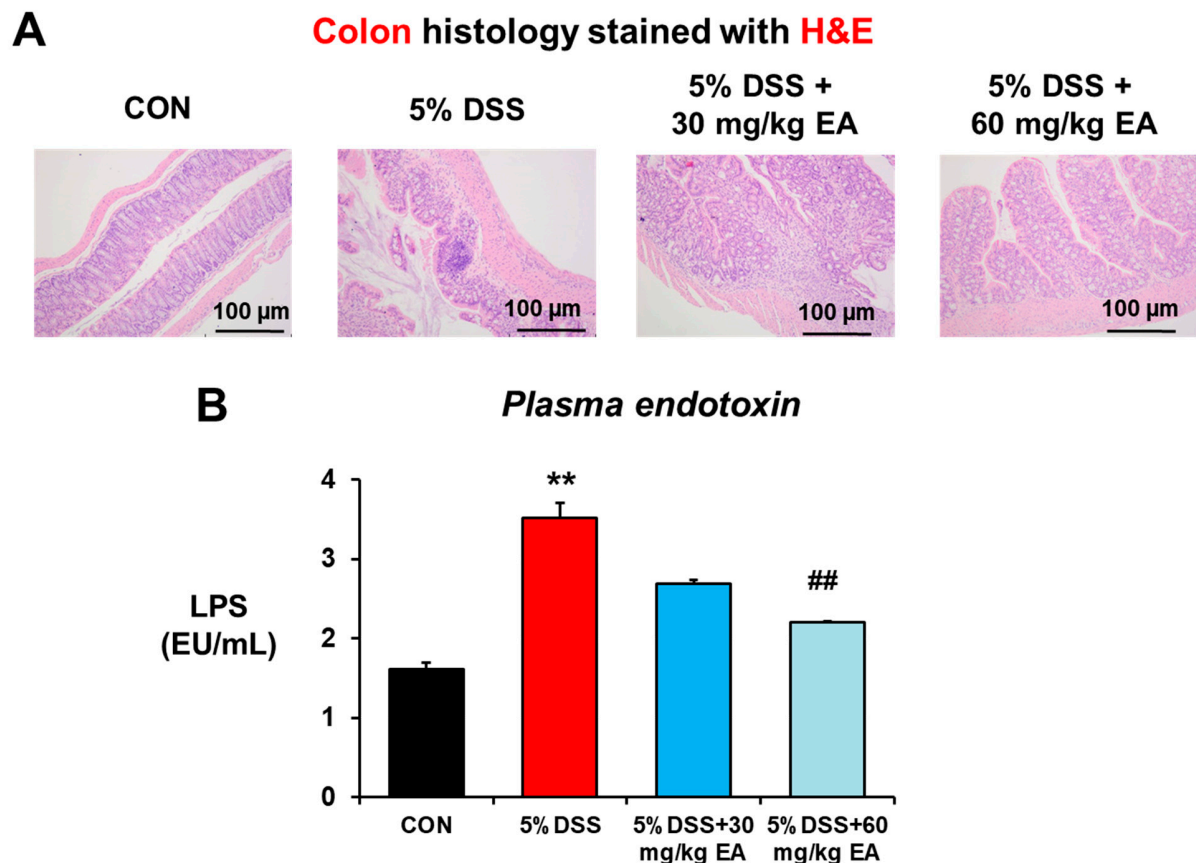

**Figure S1. Daily treatment with a lower dose of EA (30 mg/kg/day) slightly but not significantly decreased the plasma LPS level markedly elevated in DSS-treated mice.** (A) Representative H/E-stained images of formalin-fixed colon sections in the indicated groups. (B) Plasma levels of endotoxin, as a marker of gut leakiness. Data are expressed as the means  $\pm$  S.E.M. ( $n=5-7$ /group). The statistical significance between values for each group was assessed by Dunnett's t-test. \*\* $P<0.001$  between 5% DSS and control groups; ## $P<0.05$  between 5% DSS vs. 60 mg/kg EA groups.

## Supplementary Table S1

**Supplementary Table S1. Scoring system to calculate the disease activity index (DAI).** The DAI value is calculated as the sum of scores of weight loss, stool consistency, and blood feces.

| Score | Weight loss | Stool consistency | Visible blood feces |
|-------|-------------|-------------------|---------------------|
| 0     | None        | Normal            | None                |
| 1     | 1~5%        |                   |                     |
| 2     | 6~10%       | Loose             | Slight bleeding     |
| 3     | 11~20%      |                   |                     |
| 4     | <20%        | Diarrhea          | Gross bleeding      |
